# Supplementary material for: Geospatial hotspots and neighbourhood deprivation associated with unintentional home injuries in British Columbia, Canada
Source: Research Square preprint supplement (doi:10.21203/rs.3.rs-6325654/v1), 2025-05-13
Supplement: Supplementary file 1 [file 079b9b582824089ac4e400b1.docx]

**Canadian index of multiple deprivation and their corresponding indicators, British Columbia, 2016**

| **Ethno-cultural composition** | **Situational vulnerability** | **Economic dependency** | **Residential instability** |
| --- | --- | --- | --- |
| Proportion of population who self-identify as visible minority | Proportion of population that identifies as Indigenous | Proportion of population participating in labour force (aged 15 and older) | Proportion of dwellings that are apartment buildings |
|  |  |  |  |
| Proportion of population that is foreign-born | Proportion of population aged 25-64 without a high school diploma | Proportion of population aged 65 and older | Proportion of persons living alone |
|  |  |  |  |
| Proportion of population with no knowledge of either official language (linguistic isolation) | Proportion of dwellings needing major repairs | Ratio of employment to population | Proportion of dwellings that are owned |
|  |  |  |  |
| Proportion of population who are recent immigrants (arrived in five years prior to Census) | Proportion of population that is low-income | Dependency ratio (population aged 0-14 and aged 65 and older divided by population aged 15-64 | Proportion of population who moved within the past five years |
|  | Proportion of single parent families |  |  |
