# Supplementary material for: Geospatial hotspots and neighbourhood deprivation associated with unintentional home injuries in British Columbia, Canada
Source: Research Square preprint supplement (doi:10.21203/rs.3.rs-6325654/v1), 2025-05-13
Supplement: Supplementary file 2 [file 597341211f919e14b707ba90.docx]

**Remoteness classification of British Columbia’s census subdivisions**

**
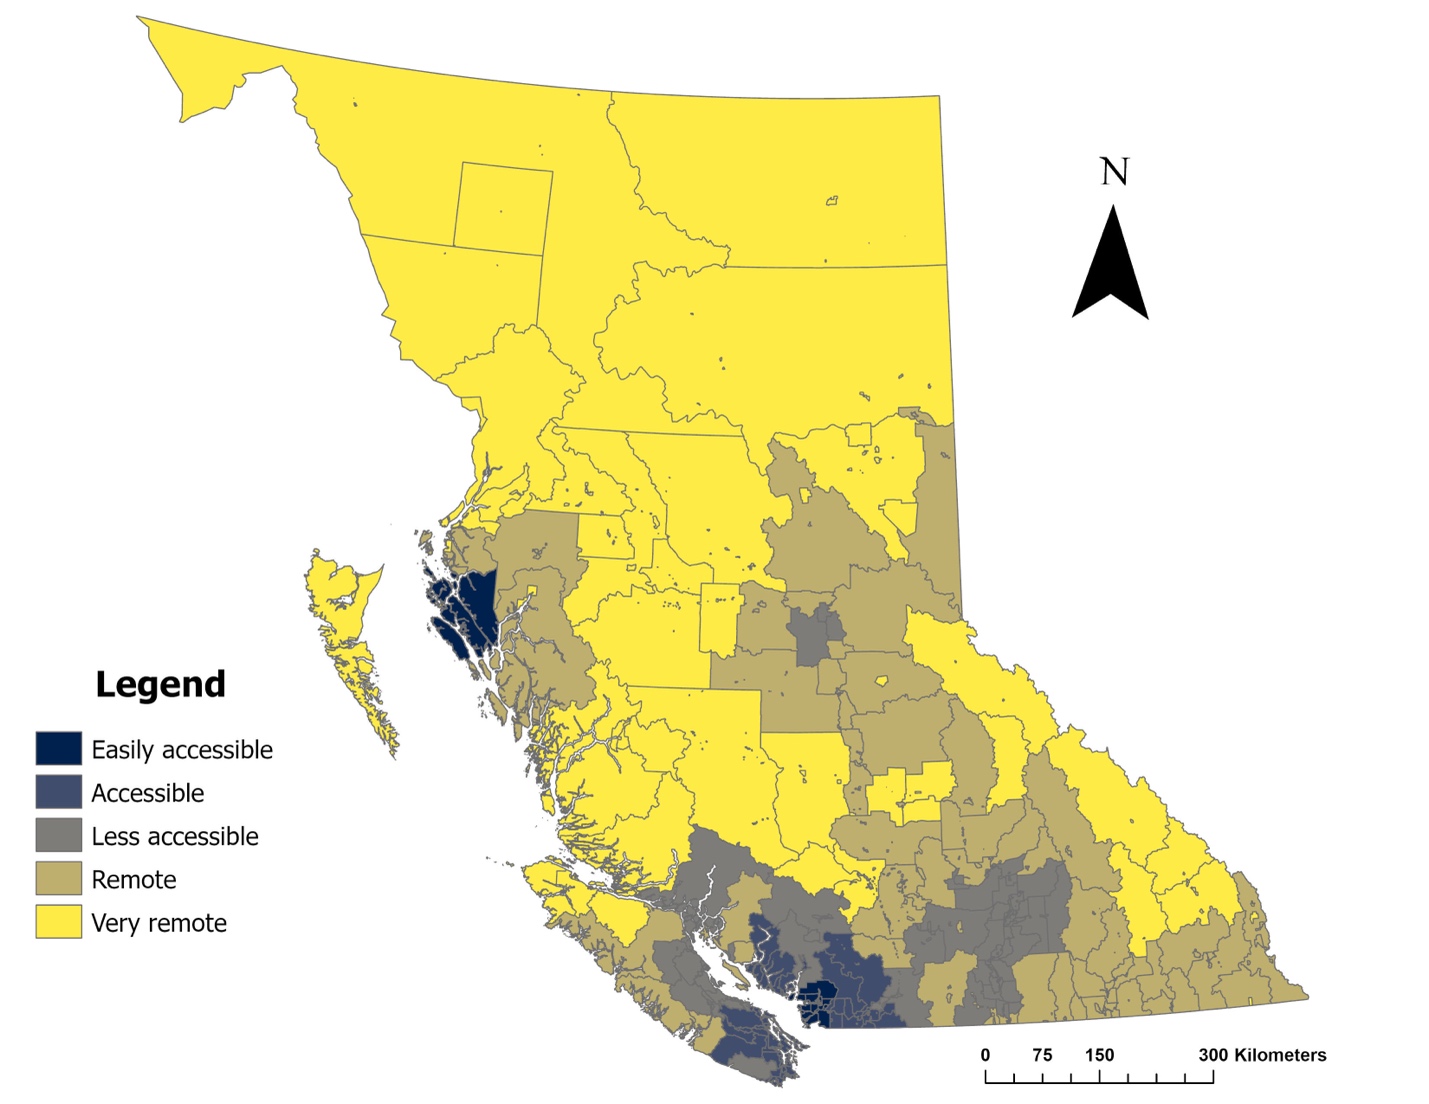
**

This map illustrates the classification of British Columbia's census subdivisions into five levels of remoteness based on Statistics Canada's 2021 Census data. The classification uses the Index of Remoteness (IR), a continuous measure ranging from 0 to 1, where 0 represents the least remote areas and 1 represents the most remote areas. The IR considers both the distance to population centres and the population size of these centres.

The five categories of remoteness are defined as follows:

1. Easily Accessible: IR < 0.1500
2. Accessible: IR 0.1500 - 0.2766
3. Less Accessible: 0.2767 - 0.4033
4. Remote: 0.4034 - 0.5531
5. Very Remote: IR > 0.5532
