# Supplementary material for: Geospatial hotspots and neighbourhood deprivation associated with unintentional home injuries in British Columbia, Canada
Source: Research Square preprint supplement (doi:10.21203/rs.3.rs-6325654/v1), 2025-05-13
Supplement: Supplementary file 3 [file fdfacfce2cfccdd87f4a3019.docx]

**ICD-10 CA Coding for unintentional injuries**

| **Injury Category** | **ICD10-CA Codes** |
| --- | --- |
| Near-drowning/submersion | W65-W74, V92 |
| Falls | W00-W19 |
| Unintentional Poisoning | X40-X49 |
| Suffocation | W75-W84 |
| Fires/Burns | X00-X19 |
| Overexertion | X50 |
| Cut/pierce | W25-W29, W45-W46 |
| Struck by or against | W20-W22, W50-W52 |
| Caught or crushed between objects | W23 |
| Bitten by dog or other mammal | W54, W55 |
| Foreign body - eye or orifice | W44 |
| Nonvenomous insect bites | W57 |
